# Supplementary material
Source: Elsevier journal article supplement (https://www.sciencedirect.com/science/article/pii/S1413867021001252)
Supplement: mmc1 [file S1413867021001252:mmc1.pdf]

## Supplement

### Questionnaire

1. Where do you practice most of the time?

Answer Choices:

- Emory University Hospital
- Emory University Hospital Midtown
- Emory St Joseph's Hospital
- Emory John's Creek
- Grady
- VA Medical Center
- The Emory Clinic
- A combination
- Other (please describe)

### Clinical Vignettes

2. A 25yo woman is admitted to the hospital with sepsis. She is found to have pyelonephritis. You obtain blood cultures and urine cultures, which grow *Klebsiella pneumoniae*. Below are the results of the sensitivities of her blood culture.

| Antibiotic                    | Susceptibility |
|-------------------------------|----------------|
| Ampicillin-Sulbactam          | S              |
| Cefazolin                     | R              |
| Ceftriaxone                   | S              |
| Cefepime                      | S              |
| Piperacillin Tazobactam       | S              |
| Levofloxacin                  | I              |
| Trimethoprim-Sulfamethoxazole | I              |
| Gentamicin                    | S              |

***Which antibiotic would you choose to treat her?***

- Ampicillin-Sulbactam (Unasyn)
- Ceftriaxone
- Cefepime
- Piperacillin-Tazobactam (Zosyn)
- Meropenem
- Levofloxacin
- TMP-SMX (Bactrim)

- Gentamicin

3. In a few words, why did you choose this antibiotic? (*Free Text*)
4. An 85yo woman is admitted to the hospital with sepsis. She is found to have nephrolithiasis and symptoms of pyelonephritis. You obtain blood cultures and urine cultures, which grow *Proteus mirabilis*. Below are the results of the sensitivities of her blood culture.

| Antibiotic                        | MIC | Susceptibility |
|-----------------------------------|-----|----------------|
| Ampicillin-Sulbactam              | 8   | S              |
| Cefazolin                         | 32  | R              |
| Ceftriaxone                       | 2   | S              |
| Cefepime                          | 1   | S              |
| Piperacillin<br>Tazobactam        | 8   | S              |
| Levofloxacin                      | 1   | I              |
| Trimethoprim-<br>Sulfamethoxazole | 8   | I              |
| Gentamicin                        | 1   | S              |

***Which antibiotic would you choose to treat her?***

- Ampicillin-Sulbactam (Unasyn)
- Ceftriaxone
- Cefepime
- Piperacillin-Tazobactam (Zosyn)
- Meropenem
- Levofloxacin
- TMP-SMX (Bactrim)
- Gentamicin

5. In a few words, why did you choose this antibiotic? (*Free Text*)

**Multiple Choice Section**

6. What does Minimum Inhibitory Concentration (MIC) mean?

Answer Choices:

- The lowest concentration of bacteria that still grow on blood medium culture impregnated with a particular antibiotic
- The lowest concentration of an antibiotic that inhibits growth of a given strain of bacteria

- The lowest concentration of sugar water in which bacteria can grow

7. Which of the following is true about MIC (choose all that apply)

Answer Choices:

- Lower is better
- Higher is better
- I don't know anything about MIC

8. Do you want MIC information available to you in the reports from the microbiology lab in addition to whether the bacteria are sensitive, intermediate or resistant to an antibiotic?

Answer Choices:

- Yes
- No
- Not Sure

9. What type of medicine do you practice?

Answer Choices:

- Surgery (Including sub-specialties)
- Internal Medicine (Including sub-specialties)
- Psychiatry
- Emergency Medicine
- Neurology
- PM&R
- OB/Gynecology
- Family Medicine
- Critical Care

10. What is your title?

Answer Choices:

- Resident
- PA or NP
- Fellow
- Attending

11. If you answered "Resident" what year of training are you in?

Answer Choices:

- PGY-1
- PGY-2
- PGY-3
- PGY-4
- PGY-5

- PGY-6
- PGY-7
- PGY-8

12. Where do you spend a majority of your clinical time?

Answer Choices:

- Inpatient
- Outpatient
- Relatively even mix of both
